# Supplementary material for: Anti-Invasion and Antiangiogenic Effects of Stellettin B through Inhibition of the Akt/Girdin Signaling Pathway and VEGF in Glioblastoma Cells
Source: MDPI journal article supplement (doi:10.3390/cancers11020220), 2019-02-14
Supplement: s1 [file s1]

# Supplementary Materials: Anti-Invasion and Antiangiogenic Effects of Stelletin B through Inhibition of the Akt/Girdin Signaling Pathway and VEGF in Glioblastoma Cells

Shu-Yu Cheng, Nan-Fu Chen, Pi-Yu Lin, Jui-Hsin Su, Bing-Hung Chen, Hsiao-Mei Kuo, Chun-Sung Sung, Ping-Jyun Sung, Zhi-Hong Wen and Wu-Fu Chen

Table S1. Zebrafish survival rate.

| Stelletin B (nM) | Total number | Death number | Death rate (%) |
|------------------|--------------|--------------|----------------|
| 0                | 18           | 0            | 0              |
| 10               | 18           | 0            | 0              |
| 50               | 18           | 0            | 0              |
| 100              | 18           | 1            | 5.56           |
| 250              | 18           | 2            | 11.11          |

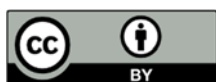

© 2019 by the authors. Licensee MDPI, Basel, Switzerland. This article is an open access article distributed under the terms and conditions of the Creative Commons Attribution (CC BY) license (<http://creativecommons.org/licenses/by/4.0/>).
